# Supplementary material for: The Akt Forkhead Box O Transcription Factor Axis Regulates Human Cytomegalovirus Replication
Source: PubMed Central journal article supplement (PMC9426471; doi:10.1128/mbio.01042-22), 2022-08-10

Extended Data for Fig 1D; includes mock infection series

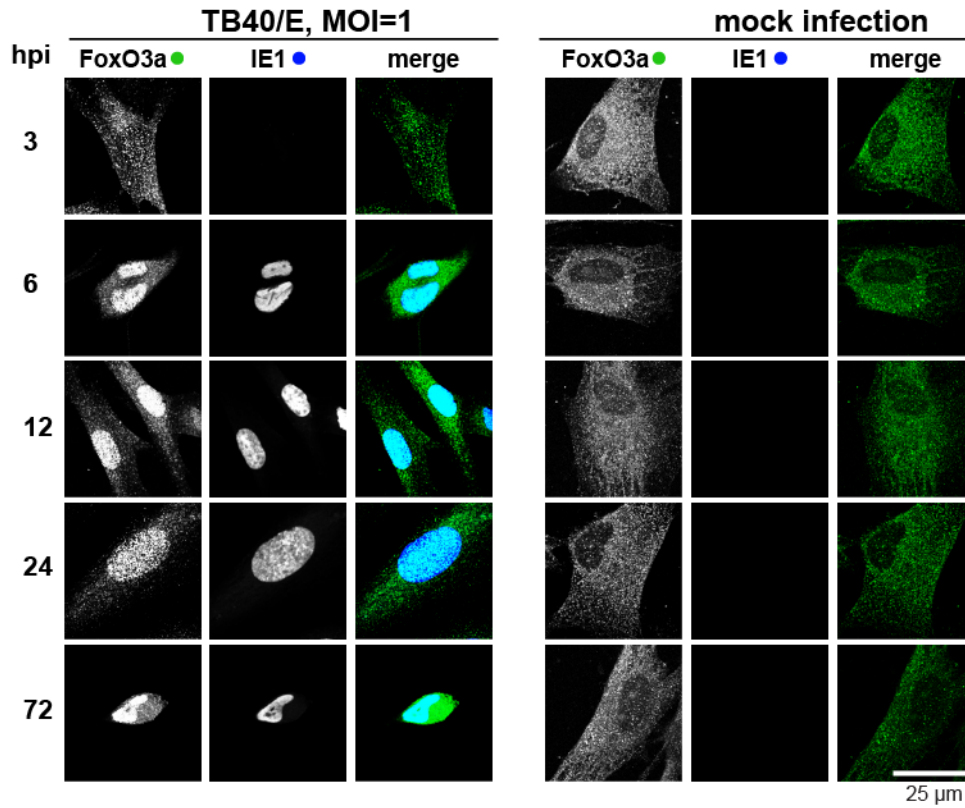

Extended Data for Fig 2D; full time course (TB40/E, MOI=1)

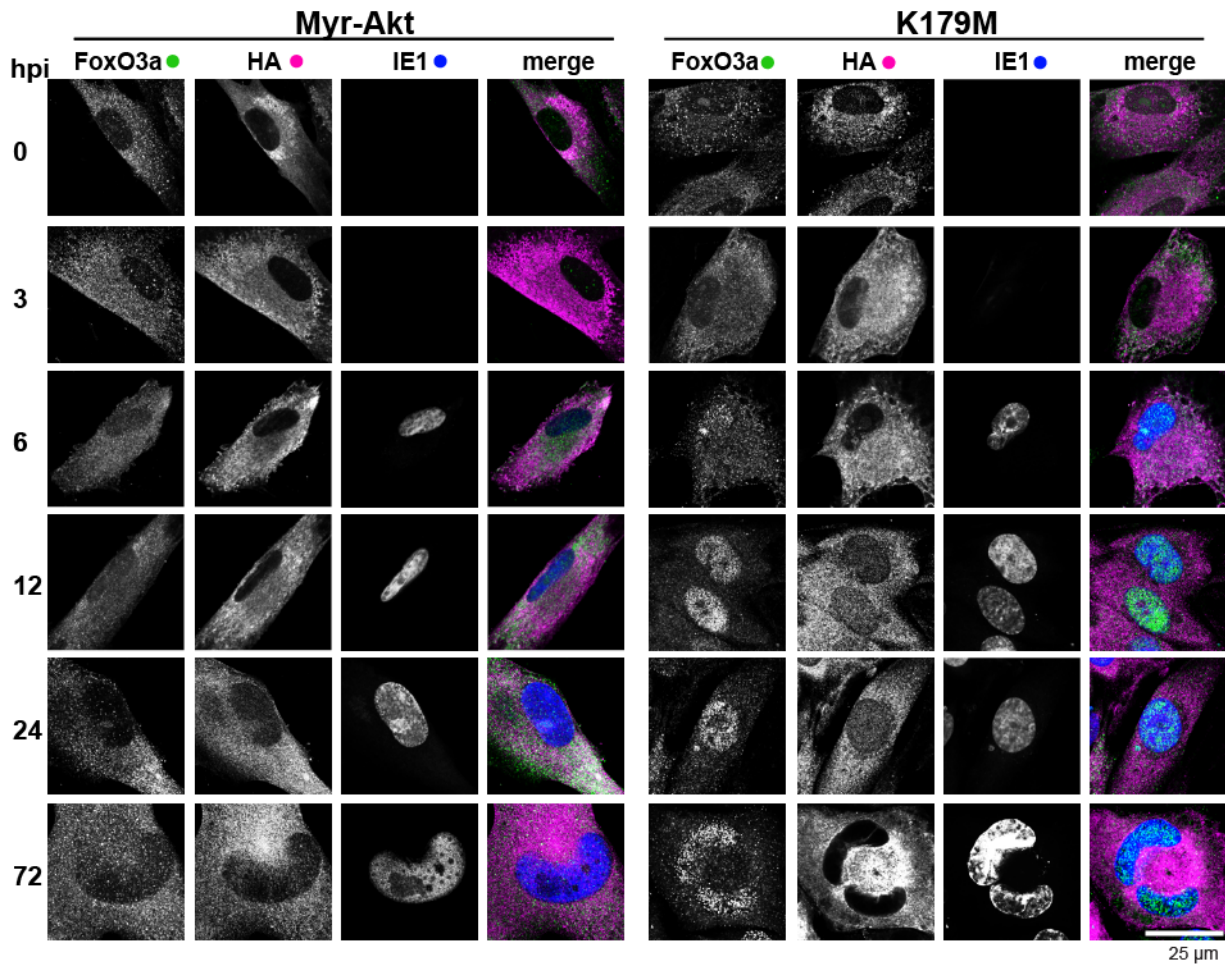

Supplement: mbio.01042-22-s0002.pdf [file mbio.01042-22-s0002.pdf]
